# Supplementary material for: Classifiers and their Metrics Quantified
Source: PubMed Central journal article supplement — Mol Inform. 2018 Jan 23;37(1-2):1700127. doi: 10.1002/minf.201700127 (PMC5838539; doi:10.1002/minf.201700127), 2018-01-23

# molecular informatics

models – molecules – systems

Supporting Information

Supplementary Panel/Figure images for  
manuscript  
“Classifiers and their metrics quantified”

For re-submission to Molecular Informatics by

J.B. Brown , Kyoto University

jbbrown @ kuhp.kyoto-u.ac.jp

December 2017

# Supplementary Figure: chemogenomic CV-external metric evaluation workflow

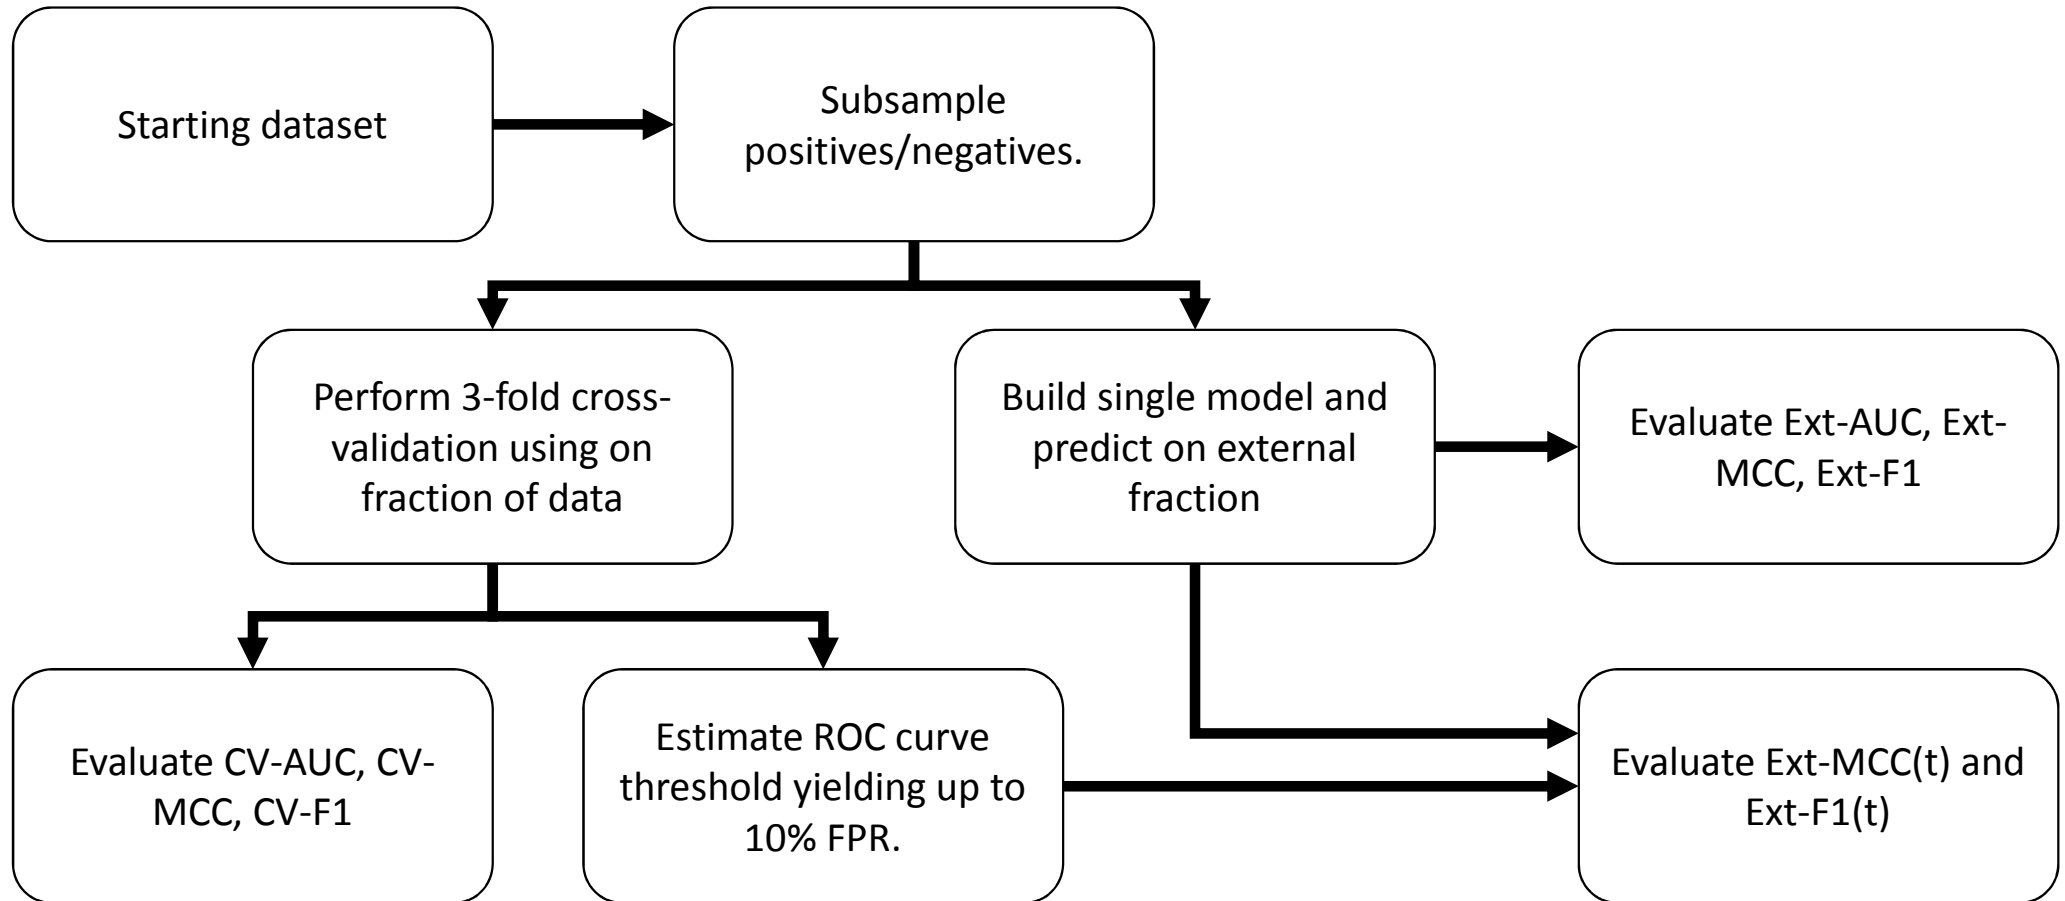

# Supplementary Figure: Cross-validation, external prediction, metrics, and their cross-correlations (Kinase SARfari 5)

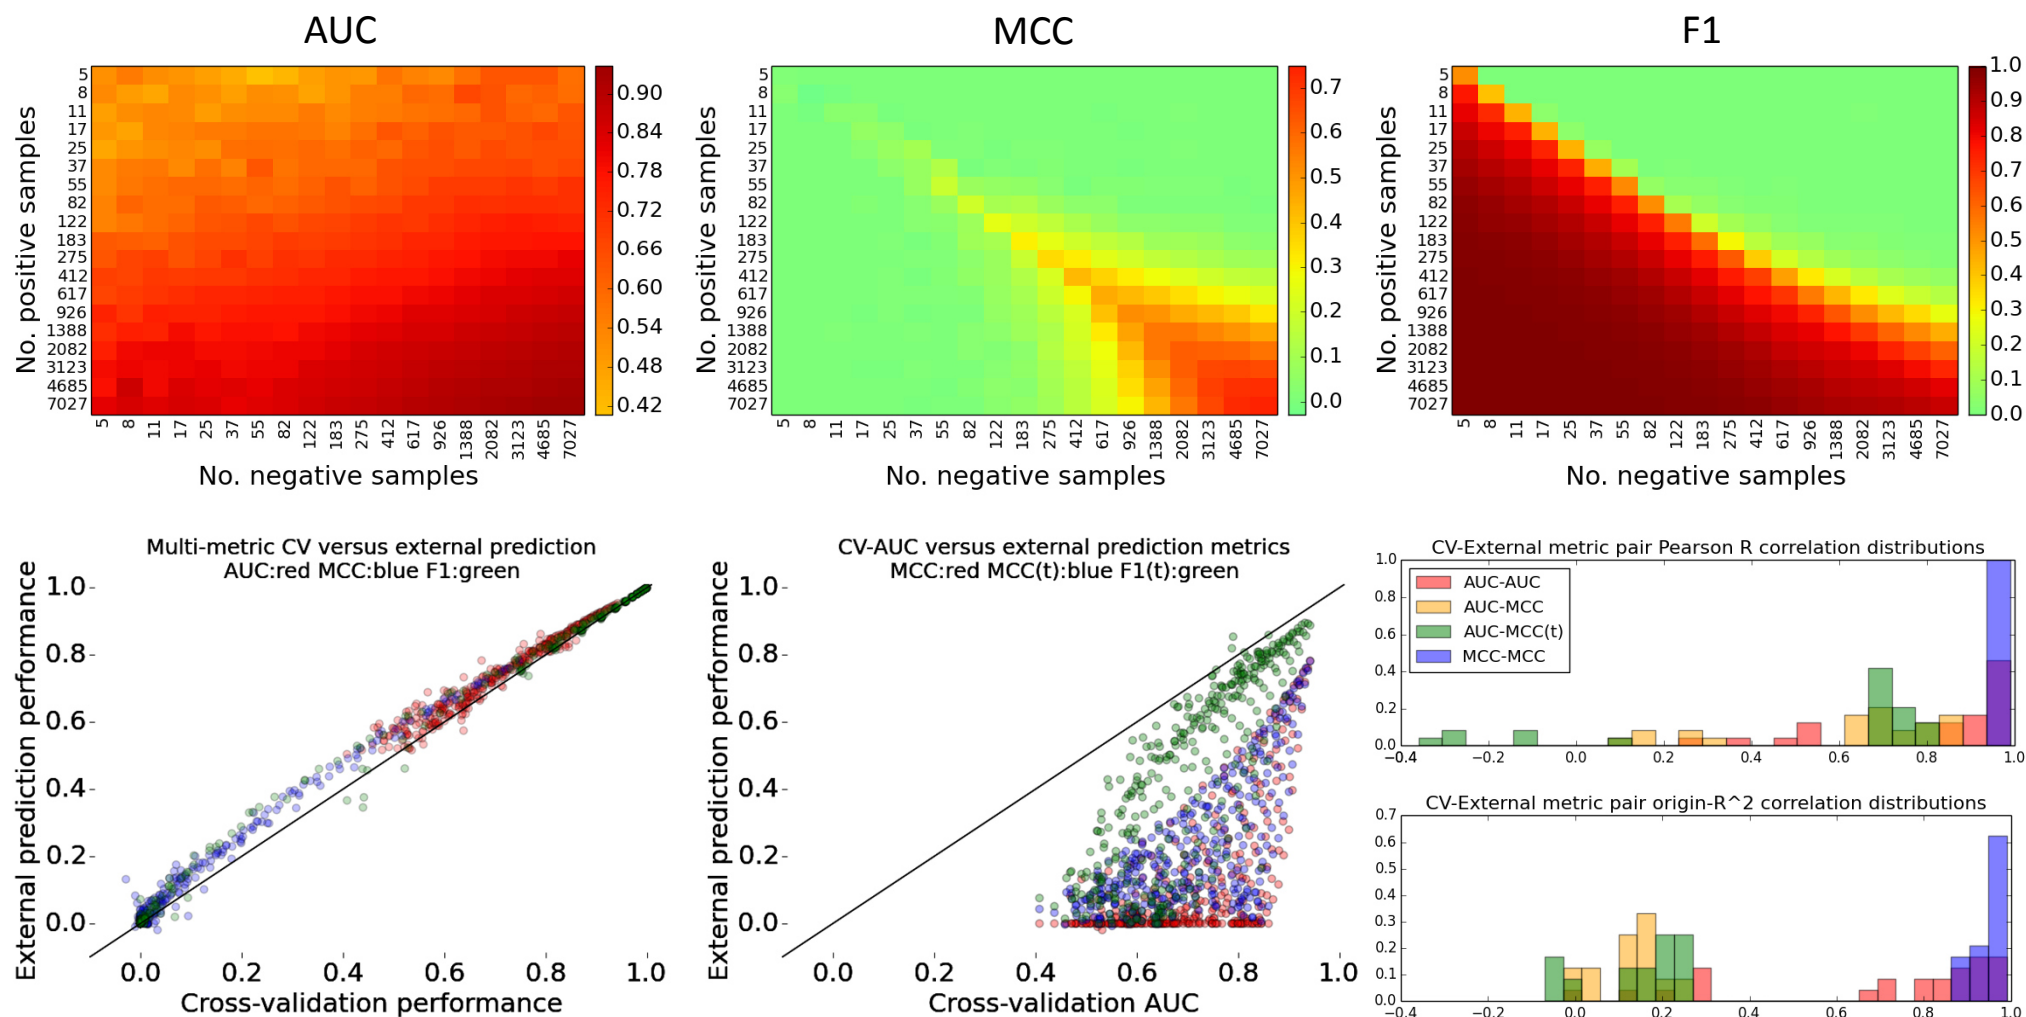

# Supplementary Figure: CV-AUC versus external prediction for other parameter sets

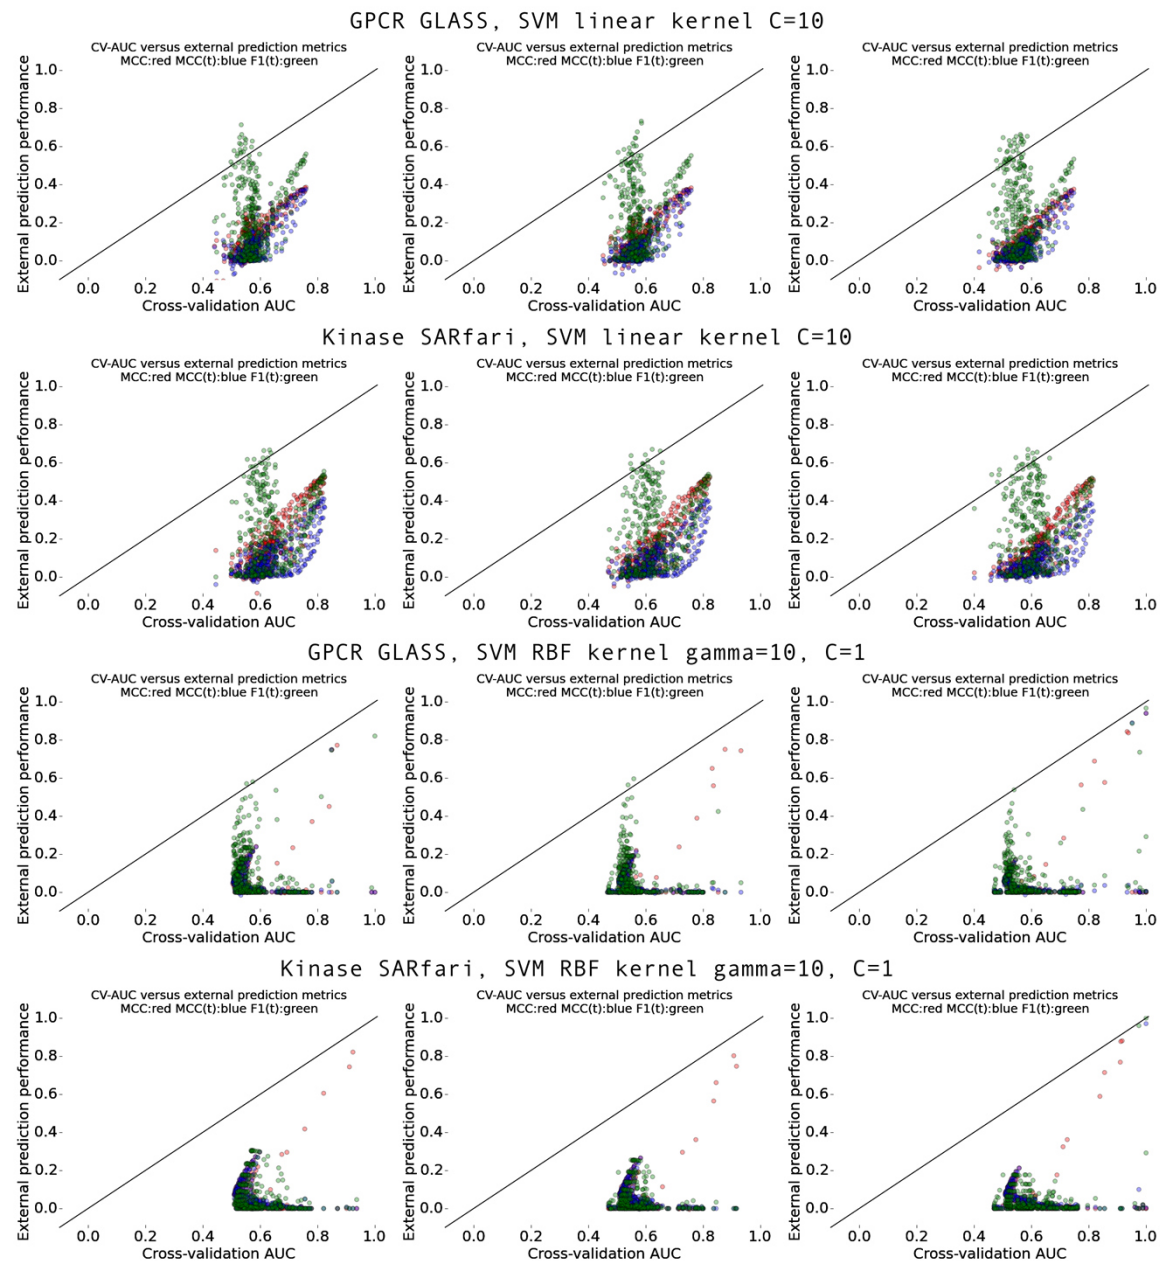

Supplement: MINF-37-na-s013.pdf [file MINF-37-na-s013.pdf]
